# Supplementary material for: Effect of Clinician Training in the Modular Approach to Therapy for Children vs Usual Care on Clinical Outcomes and Use of Empirically Supported Treatments: A Randomized Clinical Trial
Source: PubMed Central journal article supplement (PMC7431993; doi:10.1001/jamanetworkopen.2020.11799), 2020-08-17
Supplement: jamanetwopen-3-e2011799-s001.pdf [file jamanetwopen-3-e2011799-s001.pdf]

1 **Treatment Approaches for Children and Young people**  
2 **(TrACY) in CAMHS Study**

3  
4  
5

## **STUDY PROTOCOL**

---

Protocol title                      Treatment Approaches for Children and Young people (TrACY) in  
Child and Adolescent Mental Health Services (CAMHS) Study

Principal investigators            **Professor Sally Merry and Dr Sue Crengle**  
  
c/- Department of Psychological Medicine, F.M.H.S., Private Bag  
92019, Auckland, New Zealand 1142  
  
Phone +64 9 373 7599 ext 86981

Study consultant                    **Professor John Weisz**

Co-investigators                    **Dr Karolina Stasiak, Dr Mathijs Lucassen, Dr Ainsleigh Cribb-Su'a,  
Dr Jik Loy, Associate Professor Chris Frampton, Assistant  
Professor Sarah Kate Bearman, Dr Ana Ugueto, Dr Jenny Herren  
and Dr Monique Faleafa.**

Study manager                      **Dr Mathijs Lucassen (1 Oct 2013 - 1 June 2015)  
Sarah Hopkins (1 June 2015 – 30 Sept 2016)**  
  
**Department of Psychological Medicine, F.M.H.S., Private Bag  
92019, Auckland, New Zealand 1142**  
  
**Phone +64 9 373 7599 ext 82015**

Reviewed & funded by            **The Health Research Council (New Zealand)**

Date                                      **Original protocol: 3 July 2013 (updated 5 February 2016 – v4)**

---

6  
7

8  
9  
10  
11  
12  
13  
14  
15  
16  
17  
18

## Table of contents

|                                |    |
|--------------------------------|----|
| Table of contents .....        | 2  |
| List of abbreviations.....     | 3  |
| 1. Overview.....               | 4  |
| 2. Rationale.....              | 8  |
| 3. Flowchart and timeline..... | 14 |
| 4. Study methods.....          | 16 |
| 5. Administration.....         | 28 |
| 6. References.....             | 31 |

19

## List of abbreviations

20

21 BPM

Brief Problem Monitor

22 CAMHS

Child and Adolescent Mental Health Service

23 CHU9D

Child Health Utility Measure

24 DAWBA

Development and Well-Being Assessment

25 DHB

District Health Board

26 EBT

Evidence-Based Therapy/Treatments

27 HoNOSCA

Health of the Nations Outcome Scale for Children and Adolescents

28 MATCH-ADTC or MATCH

Modular Approach to Therapy for Children with Anxiety,

29

Depression, Trauma and Conduct problems

30 SDQ

Strengths and Difficulties Questionnaire

31 TPA

Top Problem Assessment

32 TrACY

Treatment Approaches for Children and Young people

33 TSI

Therapist Satisfaction Inventory

34 UC

Usual Care

35

# 1. Overview

36 **1.1 Short title:** The TrACY Study

37

38 **1.2 Investigators and study centres:** The overall design and conduct of this trial is the  
39 responsibility of the co-principal investigators, study consultant, co-investigators and trial  
40 steering committee. The study will be based at the Department of Psychological Medicine,  
41 University of Auckland. Teams from several District Health Board (DHB) Child and Adolescent  
42 Mental Health Services (CAMHS) will enrol participants in the study.

43

44 **1.3 Study period:** 1 October 2013 to 30 September 2016 (study set up, clinician training,  
45 recruitment, data analysis, write up and dissemination of results). Participant recruitment is  
46 expected to begin in March 2014.

47

48 **1.4 Objective:** To improve the overall quality of care received by children and adolescents  
49 attending child and adolescent mental health services (CAMHS) in New Zealand. Specifically for  
50 those children or adolescents with anxiety, depression, trauma-related symptoms and  
51 disruptive behaviour – for which MATCH-ADTC (Modular Approach to Therapy for Children with  
52 Anxiety, Depression, Trauma and Conduct problems) has been developed and formally  
53 evaluated with.

54

55 **1.5 Study design and methodology:** This is a pragmatic multi-site randomised controlled  
56 effectiveness trial comparing MATCH to usual care (UC). Participants will be clinicians from  
57 participating CAMHS and child/adolescent participants (and their parents/caregivers) referred  
58 to CAMHS.

59

60 **1.6 Study population:** Children and adolescents 7 to 14 years old with anxiety, depression,  
61 trauma and disruptive behaviour of a severity that warrants treatment in a CAMHS.

62

63 **1.7 Number of participants:** Up to 400 child participants will be recruited (200 in each arm).  
64 Up to 60 clinicians will be recruited to deliver the treatments (i.e. either MATCH or UC). We  
65 aim to recruit 100 Māori and 100 Pacific child participants as part of the overall group.

66

67 **1.7 Amendment (June 2015):** Sample size reduced to at least 200 child participants  
68 (approximately 100 in each arm).

69

## Notes:

70

- 71 • Reasons for reduced recruitment:
  - 72 ○ Our recruitment rate within mainstream services has mostly been in line with our
  - 73 original estimations (that is, approximately 8 participants per clinician).
  - 74 ○ However, clinician attrition across all study sites was 50% higher than our
  - 75 estimations (34% attrition) and likely reflects the general turnover of staff at CAMHS
  - 76 sites.

- 77           ○ Reduced ability to recruit at Kaupapa Māori and Pacific clinics was due to high  
78           resource pressure at services, higher acuity of potential participants, fewer referrals  
79           of participants in the eligible age range and logistic restrictions placed upon the  
80           selection and number of clinicians able to participate in the study.
- 81           ● Due to budgetary restrictions and logistic considerations at the study sites, it was not  
82           possible to extend recruitment past June 30<sup>th</sup> 2015.
  - 83           ● The recruitment of participants from Māori and Pacific providers has fallen well short of  
84           our original study aims. Consequently, sub-analyses will no longer be conducted for our  
85           ethnic groups.
  - 86           ● A sample size of 200 participants will provide sufficient power to detect a meaningful  
87           difference in our primary outcome measure among the entire cohort.

88

89 **1.8 Main criteria for inclusion:** Children and adolescents will be eligible for inclusion in the trial  
90 if:

- 91           ● They are newly referred to CAMHS with a primary disorder that includes anxiety,  
92           depression, trauma-related symptoms or disruptive behaviour;
- 93           ● They are 7 to 14 years of age on the date of consent;
- 94           ● They are able to provide written consent (or verbal assent) and have written  
95           parental/guardian consent; and,
- 96           ● The child and their parent/guardian can speak English or there is a clinician who can  
97           provide the necessary treatment, according to the treatment arm the participant is  
98           randomised to, in the family's native language.

99

100 **1.9 Main criteria for exclusion:** Children and adolescent will be ineligible for inclusion in the  
101 trial if:

- 102           ● They are currently receiving other treatment for their disorder from the CAMHS (or  
103           another service); or,
- 104           ● They have a primary disorder of psychosis, severe intellectual disability, attention  
105           deficit-hyperactivity disorder (where the primary reason for referral is inattention  
106           and/or over-activity), autism or other pervasive developmental disorder, anorexia  
107           nervosa or bulimia nervosa; or,
- 108           ● The young person is acutely suicidal; or,
- 109           ● They have a sibling that has previously been recruited into the study.

110

111 **1.10 Intervention:** Child and adolescent participants will receive MATCH therapy from a CAMHS  
112 clinician (who usually provides clinical interventions in CAMHS) who has received MATCH  
113 training from the MATCH trainers from the USA (and the clinician will be engaged in weekly  
114 MATCH consultation sessions with MATCH trainers after the initial face-to-face training). In  
115 summary, MATCH provides effective elements of the evidence-based treatments (EBTs) for  
116 child anxiety, depression, trauma-related symptoms and disruptive behaviour in one protocol;  
117 it caters for co-morbidity and provides an opportunity to address different disorders that may  
118 emerge during therapy. MATCH is comprised of 33 modules (i.e. specific treatment procedures)  
119 which can be organised in a flexible manner.

120

121 **1.11 Duration of treatment:** Duration of treatment will vary, based on the need of the client  
122 and service-specific constraints (e.g. the need to treat rapidly in order to meet the demands of  
123 the service).

124

125 **1.12 Control:** Child and adolescent participants will receive UC from a CAMHS clinician.

126

127 **1.13 Criteria for evaluation:**

128 *Primary outcome measures*

129 • The primary clinical outcome measure is The Brief Problem Monitor (BPM) [see Primary  
130 Hypothesis 1].

131 • The primary EBT outcome measure is based on audio-recordings of all therapy sessions  
132 (a random sub-set (approximately 5 to 10%) will be analysed from both the MATCH and  
133 UC treatment arms and analysed for content of EBT) [see Primary Hypothesis 2].

134 • The primary efficiency of services outcome measure is based on total therapy input by  
135 clinicians (in minutes), contact with the CAMHS (in weeks), number of therapy sessions  
136 and number of missed therapy sessions [see Primary Hypothesis 3].

137

138 *Secondary outcomes*

139 • The Strengths and Difficulties Questionnaire (SDQ);

140 • Top Problems Assessment (TPA) (which will be administered by telephone) to be  
141 collected weekly and at follow-up;

142 • Diagnoses using the Development and Well-Being Assessment (DAWBA) at baseline and  
143 after discharge from CAMHS;

144 • The Child Health Utility (CHU9D) measure at baseline, after discharge and at follow-up.

145

146 *Other measures*

147 • Treatment provided in UC;

148 • Child's/adolescent's psychotropic medication use;

149 • Clinician rated serious adverse events;

150 • The Therapist Satisfaction Inventory (TSI) (to determine clinicians' satisfaction with  
151 therapy);

152 • Child/adolescent survey of treatment satisfaction;

153 • Parent/caregiver survey of treatment satisfaction; and,

154 • CAMHS manager/team leader satisfaction of MATCH-ADTC.

155

156 **1.14 Statistical methods:**

157 *Study power:* Approximately 8 child or adolescent participants per clinician will be needed (400  
158 child or adolescent participants in total) in order to detect moderate effect sizes. In total, 50  
159 clinicians (we will recruit up to 60 clinicians to allow for approximately 15% attrition) will  
160 provide sufficient power (80%) to detect effect sizes of approximately 0.37 as statistically  
161 significant (two-tailed  $\alpha=0.05$ ) for the comparison of outcome measures. We plan to have  
162 approximately 12 clinicians from Māori services and 12 clinicians from Pacific services.

163 Independent analyses undertaken for each of these services will, therefore, have sufficient  
164 power (80%) to detect moderate effect sizes of approximately 0.61 to 0.68 as statistically  
165 significant.

166

167 **1.14 Revised study power:** Because of the difficulties with recruitment, a revised power  
168 calculation was carried out in January 2015. By treating the whole group as a single cohort,  
169 a sample size of 200 (100 per treatment arm) will provide sufficient power (80%) to detect  
170 moderate effect sizes of approximately 0.5 to 0.55 as statistically significant (two-tailed  
171  $\alpha=0.05$ ) for the comparison of outcome measures. These calculations are based on interim  
172 analyses of the first 45 completed cases and use a valid estimation of overall variability and  
173 acknowledgement of a meaningful change in the primary outcome measure (a different of  
174 at least 2 points on externalising and internalising subscales of the BPM).

175

176 *Statistical analyses:* Both per-protocol and intention-to-treat analyses will be carried out. Both  
177 treatments (i.e. MATCH and UC) will vary in content and duration, so primary analyses will be  
178 conducted using trajectories of change across time on the Brief Problem Monitor (BPM) as the  
179 primary outcome measure.

180

181 **1.15 Funding:** The Health Research Council of New Zealand.

182

183

## 2. Rationale

### 2.1 What is the problem?

- 185
- 186
- 187
- 188
- 189
- 190
- 191
- 192
- 193
- 194
- 195
- 196
- 197
- 198
- 199
- 200
- 201
- 202
- 203
- 204
- 205
- 206
- 207
- 208
- 209
- 210
- 211
- 212
- 213
- 214
- 215
- 216
- 217
- 218
- 219
- 220
- 221
- 222
- 223
- Mental health problems are common in children and adolescents (1-5), the impact is considerable and it has been estimated that 50% of all adult mental health disorders have their onset in adolescence (6).
  - There are a number of evidence-based treatments (EBTs) for the most common mental health problems, namely anxiety, depression, trauma-related symptoms and disruptive behaviour (1). The Ministry of Health in New Zealand has repeatedly asserted the need for EBTs in mental health generally (7-9), and in CAMHS specifically (9). Cognitive behavioural therapy is an effective intervention for anxiety (46 randomised controlled trials/ RCTs), depression (18 RCTs), trauma-related symptoms (6 RCTs), and behavioural parent training is the treatment of choice for disruptive behaviour (32 RCTs) (10-13).
  - Although therapies have been shown to be effective in research settings, they are not easily translated into practice (14, 15). This is true internationally and is probably because: a) Traditional EBTs lack flexibility and focus on one disorder (16) and training for each single-focus therapy is time-consuming and costly; b) Research participants in RCTs are typically treated for one disorder whereas in clinical practice co-morbidity is common; and c) Clinical presentations may change during therapy, for example a child with depression may develop disruptive behaviours.
  - Clinicians in New Zealand often do not have the training they need to deliver EBTs for the range of problems that present at CAMHS. In New Zealand, CAMHS provide secondary level services that deal with the 3-5% most severe mental health problems of those aged 0-19 years (17). The two largest professional groups in CAMHS are nurses and social workers (18) and their pre-registration courses do not include psychological therapies (19). Therefore, most learning in CAMHS occurs 'on the job'.
  - Currently, clinicians have to train in multiple EBTs which is expensive and takes several years. For example, training in CBT is available in New Zealand in a one-year postgraduate course, which can only be accessed by up to 12 clinicians per year. Accredited training in Incredible Years (a form of parent management training) takes a year and can be accessed by up to 35 clinicians per year. Little training is available outside these courses which means that training in EBTs can only reach a small minority of the approximate 1,000 full-time equivalent CAMHS clinicians (18). The extent to which EBTs are currently used in CAMHS in New Zealand is not known, but based on CAMHS clinicians' access to training and from overseas research (20-22), it is likely to be variable across services and at times very limited.
  - Services need to deliver EBTs in a manner responsive to Māori and Pacific children. Māori, Pacific and other ethnic minority groups have been shown to have higher rates of mental health problems (23-28) yet are seldom specifically included in RCTs.
  - By 2020, there is likely to be a doubling of the demand on mental health services, which is only going to be met by a 30-40% increase in funding. This means that we need a 50-60% lift in productivity which is a huge challenge for the status quo of mental health



224 services (29). The Health Workforce 2011 Report calls for delivering mental health  
225 services more effectively and more productively (29). The report highlights the need to  
226 build and up-skill the clinical workforce, to use innovations to leverage scarce workforce  
227 resources and to ensure that therapy is delivered efficiently and effectively (29).

## 228 **2.2 A new flexible efficient modular approach to therapy**

229 Professor John Weisz, from Harvard University, and his team have been part of an initiative to  
230 develop a practical EBT system that is designed to work in day-to-day practice across a range of  
231 clinical problems. Following a number of meta-analyses which identified the therapies with the  
232 best evidence for effectiveness (15, 30, 31) Prof Weisz and his team have developed a unique  
233 treatment manual and training package (called MATCH) for children with anxiety, depression,  
234 trauma-related symptoms and/or disruptive behaviour. It is specifically designed to combine  
235 the effective elements of the EBTs for these problems in one protocol, cater for co-morbidity  
236 and provide an opportunity to address different disorders that may emerge during therapy.  
237 MATCH is comprised of 33 modules (i.e. specific treatment procedures) which can be organised  
238 in a flexible manner. Clinicians are guided by an evidence-based algorithm to tailor treatment to  
239 each child's characteristics and needs. Children/young people and their families are also given  
240 an integral role in defining the goals of therapy. Clinicians use a web-based system called  
241 Treatment Response Assessment for Children (TRAC) to monitor progress and adapt therapy in  
242 consultation with a child/young person and their family until a problem is resolved.

243  
244 MATCH was evaluated in a large RCT (n=174) comparing it against standard (single-focus) EBT  
245 and usual care in the United States of America (USA). The study was published in the  
246 prestigious *Archives of General Psychiatry*. The results showed that MATCH was significantly  
247 more effective than standard EBT and usual care, with effect sizes of 0.59-0.71 on the primary  
248 outcome variables (32).

## 249 **2.3 The need for a trial in New Zealand**

250 MATCH has been developed and evaluated in the USA, but before it can be introduced in New  
251 Zealand CAMHS it should be formally tested here. The trial we are proposing will provide New  
252 Zealand-specific assessment of effectiveness (clinical outcomes and service efficiencies) and a  
253 specific investigation of the acceptability and effectiveness for Māori and Pacific people. New  
254 Zealand has a growing child and adolescent population, especially Māori and Pacific population  
255 (33, 34), who are at increased risk of mental health problems (23-28).

256  
257 Our trial will also contribute to the international literature by: (a) Testing the effectiveness of  
258 MATCH in publicly funded mental health services (a healthcare delivery model that is different  
259 from that in the USA); and (b) Providing information about the effectiveness of MATCH across  
260 different ethnic groups.

261  
262 *This study has practical implications for the workforce.* All CAMHS clinicians (e.g. nurses, social  
263 workers and occupational therapists) should receive training in therapies that address the

264 common problems that present at services, but training is costly, time-consuming and limited.  
265 MATCH is the first comprehensive EBT system that could realistically become part of a 'core  
266 competency' training package for all CAMHS clinicians. Training in MATCH takes only six days,  
267 followed by one-hour weekly group consultation sessions. Comparable training using traditional  
268 EBTs for all the disorders included in MATCH would comprise 17 days of training and 2-3 hours  
269 per week of supervision for the duration of training.

#### 270 **2.4 Responsiveness to Māori:**

271 Almost half (44%) of the Māori population is between 0-19 years of age (18). Māori children  
272 have higher exposure to environmental factors that increase risk of mental health difficulties,  
273 higher rates of mental health problems (23, 35, 36), and account for about 26% of the total  
274 clients (0-19 years old) attending CAMHS and Alcohol and Drugs services in New Zealand (18).  
275 Between 2008 and 2009 there was a 38% increase in Māori clients accessing CAMHS (18). In  
276 2009, 1.76% of the Māori 0-19 year population accessed care, rates higher than those of the  
277 Pacific (0.99%) and Asian (0.46%) populations, and the 'total population' (1.49%) (18). In 2010  
278 86% of Māori children/young people seen in CAMHS accessed 'mainstream' services and 14%  
279 accessed Kaupapa Māori services (18). It is, therefore, important to assess whether new  
280 therapies that may be introduced into CAMHS are acceptable and efficacious for the Māori  
281 children/young people and their whānau who access these services. If MATCH is shown to be  
282 acceptable and efficacious for Māori children and whānau, the range of known effective  
283 therapies available for Māori will be increased. However, this does not diminish the need for  
284 the development of therapies by Māori and for Māori.

285  
286 MATCH was developed in the United States using the best available evidence about effective  
287 treatments for anxiety, depression, trauma-related symptoms and disruptive behaviour in  
288 children and adolescents. It provides modules for therapeutic management of these conditions,  
289 resources that can be used during therapy and guidelines to assist the clinician to make choices  
290 about therapeutic approaches. However, MATCH does not specify how the clinician engages,  
291 develops relationships, and communicates with the children and their families. This will allow  
292 Kaupapa Māori services and clinicians working with Māori children and whānau to continue to  
293 use their culturally appropriate practices and tikanga. Furthermore, we are able to develop  
294 culturally appropriate resources for Māori children and whānau that can be used with the  
295 MATCH modules.

296  
297 We have specifically approached and met with Kaupapa Māori services (e.g. He Kaakano at  
298 Counties Manukau DHB and Te Whare Marie at Capital and Coast DHB) and they are keen to  
299 participate in the trial. One mainstream CAMHS (Te Roopu Kimiora, Northland DHB) has a high  
300 proportion of Māori clients (approximately 50%) and this CAMHS has expressed considerable  
301 interest in participating in a RCT of MATCH. We are hoping that through recruitment in Kaupapa  
302 Māori and mainstream services approximately 130 Māori children/young people will participate  
303 in the trial (allowing us to meet our aim of at least 100 Māori children/young people, and  
304 increasing the power of our Māori analyses). The study has been designed to ensure power to  
305 identify moderate effect sizes in clinical outcome measures for Māori children/young people.

306 We will also be able to examine service level (process measures) separately for Kaupapa Māori  
307 services. We have Māori researchers on the team. Dr Crengle shares the Principal Investigator  
308 role with Associate Professor Merry, and Dr Cribb-Su'a will be the Māori New Zealand MATCH  
309 advisor. Both Drs Crengle and Cribb-Su'a have been involved in the design of the study since its  
310 inception. We have met with an advisory group comprising a kaumātua (Rawiri Wharemate)  
311 and Māori clinicians experienced in work with children and adolescents with mental health  
312 problems (Dr Matt Shepherd and Tania Cargo – Clinical Psychologists, Janice Beazley – Māori  
313 Clinical Advisor from the Werry Centre, Dr Cribb-Su'a and Dr Crengle). After our initial  
314 meetings, this group advised us to proceed with the development of a full Health Research  
315 Council proposal and has agreed to provide on-going oversight for the duration of the project.  
316

317 **2.4 Amendment (August 2015):** Our ability to recruit at Kaupapa Māori and Pacific clinics  
318 was significantly reduced as a result of resource pressure at services, high acuity of  
319 potential participants, fewer referrals of participants in the eligible age range and logistic  
320 restrictions placed upon the selection and number of clinicians able to participate in the  
321 study. Consequently, we will no longer be conducting sub-analysis for our ethnic groups as  
322 reduced recruitment in these groups does not allow for meaningful statistical comparisons.  
323 However, we do intend to carry out supplementary qualitative research to establish the  
324 views of Māori participants and clinicians regarding the appropriateness of MATCH for  
325 these populations. We are working in consultation with the Māori co-investigators in our  
326 research team and Māori clinicians within the TrACY study to ensure that this research is  
327 carried out in the most appropriate manner.  
328

329 **2.4 Amendment (February 2016):** We will supplement our primary analyses with the  
330 addition of key informant interviews with Māori and Pacific clinicians who delivered  
331 MATCH, as well as their team leaders. Through these key informant interviews, we would  
332 like to establish their views regarding the appropriateness of MATCH and the key  
333 adaptations for the culturally-sensitive implementation of MATCH for these populations.  
334

335 Specifically we would like to explore the following with appropriate study clinicians:

- 336 1. Their perspective on the acceptability and appropriateness of MATCH for use with  
337 Māori/Pasifika children and young people (CYP).
- 338 2. The strengths and limitations of MATCH for use with Māori/Pasifika CYP.
- 339 3. What, if any, adaptations clinicians made to the way MATCH was used in the therapy  
340 session to ensure that it was delivered in a culturally appropriate way?
- 341 4. Any recommendations that could be incorporated for use with Māori/Pasifika CYP if  
342 MATCH was implemented nationally.

343  
344 During the TrACY trial the clinicians providing MATCH have received supervision from  
345 experienced MATCH therapists who live and work in the USA. We would also like to  
346 explore clinician's experience of this supervision.

- 347 5. How useful was the MATCH supervision?

- 348 6. Were recommendations made during supervision consistent with the kaupapa  
349 (philosophy) and tikanga (practices) used with Māori/Pasifika CYP by the  
350 clinician/service?

## 351 **2.5 Responsiveness to Pacific people:**

352 We have purposely approached Pacific CAMHS and invited them to participate in the trial. To  
353 date, Vaka Toa (Counties Manukau DHB) and Health Pasifika (Capital and Coast DHB) are keen  
354 to participate. We are hoping that through recruitment in Pacific and mainstream services  
355 approximately 130 Pacific children/young people will participate in the trial (allowing us to  
356 meet our aim of at least 100 Pacific children/young people, and increasing the power of our  
357 Pacific analyses). The study has been designed to ensure power to identify moderate effect  
358 sizes in clinical outcome measures for Pacific children/young people. We will also be able to  
359 examine service level (process measures) separately for Pacific services. We have an  
360 experienced Pacific clinician, researcher and workforce development leader on the team, Dr  
361 Faleafa, who has been involved in the design of the study since its inception and she has met  
362 with Pacific CAMHS with others from the research team. Dr Faleafa will be the Pacific New  
363 Zealand MATCH advisor.

364  
365 **2.5 Amendment (August 2015):** Our ability to recruit at Kaupapa Māori and Pacific clinics  
366 was significantly reduced as a result of resource pressure at services, high acuity of  
367 potential participants, fewer referrals of participants in the eligible age range and logistic  
368 restrictions placed upon the selection and number of clinicians able to participate in the  
369 study. Consequently, we will no longer be conducting sub-analysis for our ethnic groups as  
370 reduced recruitment in these groups does not allow for meaningful statistical comparisons.  
371 However, we do intend to carry out supplementary qualitative research to establish the  
372 views of Pacific participants and clinicians regarding the appropriateness of MATCH for  
373 these populations. We are working in consultation with the Pacific co-investigators in our  
374 research team and Pacific clinicians within the TrACY study to ensure that this research is  
375 carried out in the most appropriate manner.

376  
377 **2.5 Amendment (February 2016):** We will supplement our primary analyses with the  
378 addition of key informant interviews with Māori and Pacific clinicians who delivered  
379 MATCH, as well as their team leaders. Through these key informant interviews, we would  
380 like to establish their views regarding the appropriateness of MATCH and the key  
381 adaptations for the culturally-sensitive implementation of MATCH for these populations.

382  
383 Specifically we would like to explore the following with appropriate study clinicians:

- 384 1. Their perspective on the acceptability and appropriateness of MATCH for use with  
385 Māori/Pasifika children and young people (CYP).
- 386 2. The strengths and limitations of MATCH for use with Māori/Pasifika CYP.
- 387 3. What, if any, adaptations clinicians made to the way MATCH was used in the therapy  
388 session to ensure that it was delivered in a culturally appropriate way?

- 389 4. Any recommendations that could be incorporated for use with Māori/Pasifika CYP if  
390 MATCH was implemented nationally.

391

392 During the TrACY trial the clinicians providing MATCH have received supervision from  
393 experienced MATCH therapists who live and work in the USA. We would also like to  
394 explore clinician's experience of this supervision.

- 395 5. How useful was the MATCH supervision?

- 396 6. Were recommendations made during supervision consistent with the kaupapa  
397 (philosophy) and tikanga (practices) used with Māori/Pasifika CYP by the  
398 clinician/service?

399

400

401

### 3. Flowchart and timeline

#### 3.1 Study flowchart

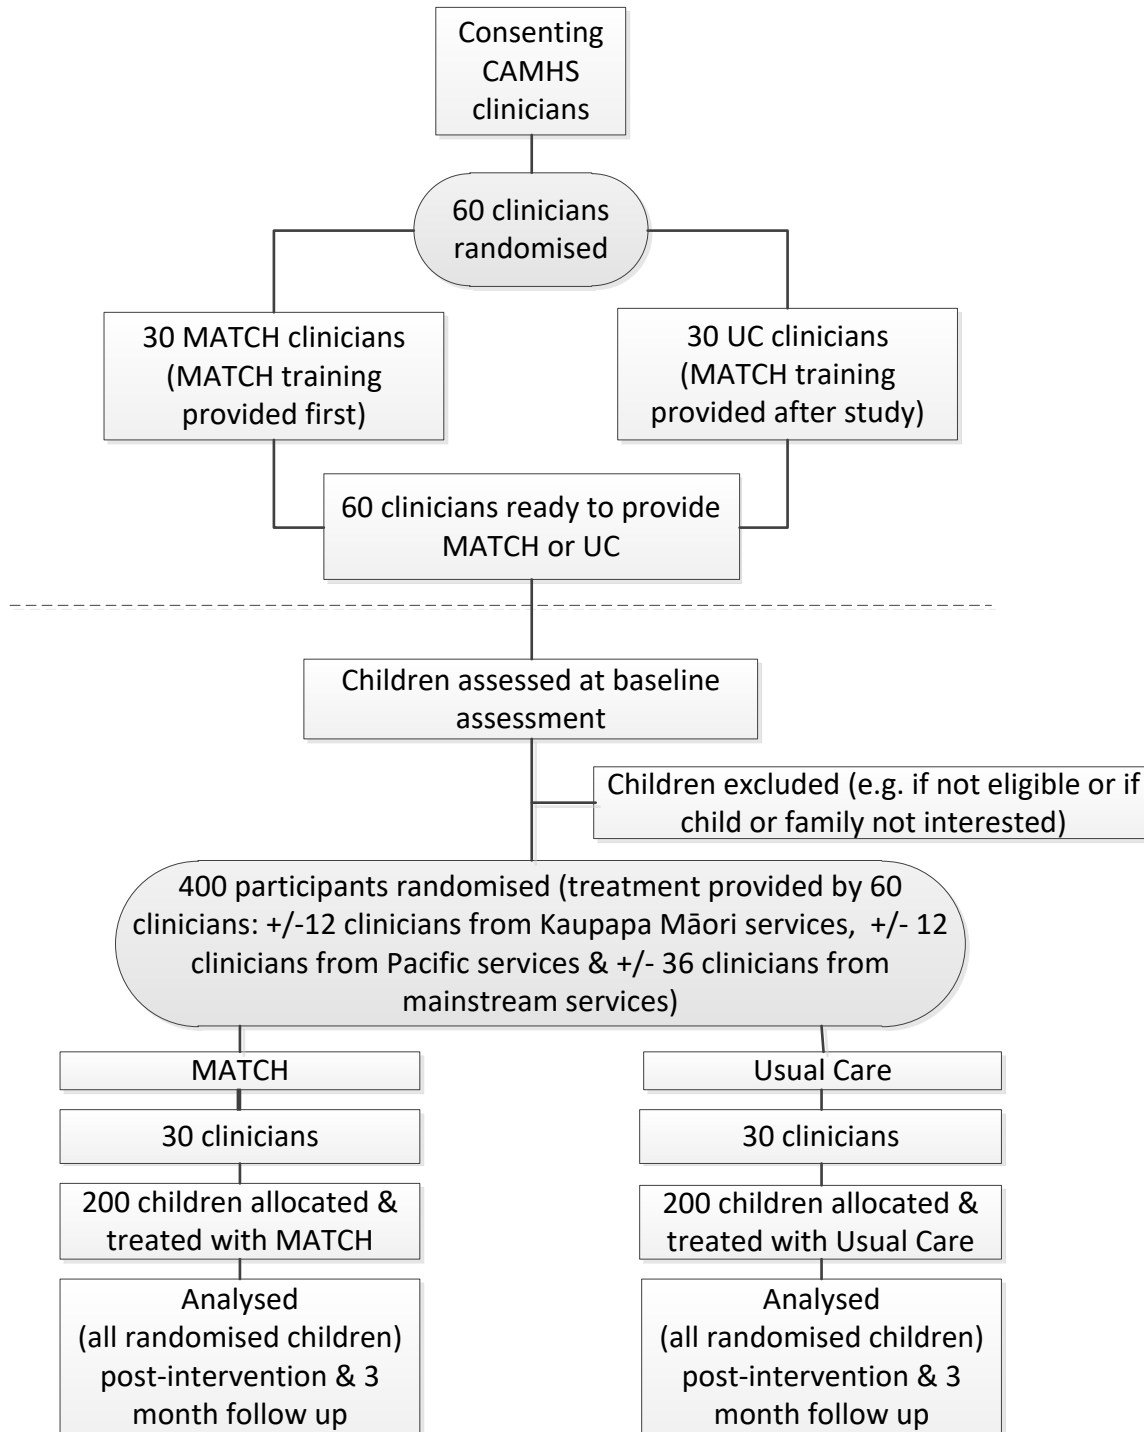

403  
404

**405 3.2 Study timeline**

- 406 • July 2013: Ethics application submitted
- 407 • Oct 2013: HRC funding starts
- 408 • Oct 2012-Jan 2013: Set up study sites and test systems
- 409 • Feb 2014: MATCH training (for clinicians randomised to MATCH)
- 410 • March 2014: Participant recruitment begins (recruitment for +/- 15
- 411 months) (Note: we believe we will be able to recruit within
- 412 this time period based on information provided by
- 413 participating services).
- 414 • June 2015: All participant recruitment completed
- 415 • Jan-Feb 2016: All 3 month follow-up assessments completed with
- 416 participants, all service use parameters data collected
- 417 • End of Mar 2016: Data clean up and lock down
- 418 • April to Sept 2016: Data analysis, feedback to sites and community,
- 419 dissemination to wider academic and other communities,
- 420 MATCH training for UC clinicians

421

## 4. Study methods

422 Our group is made up of researchers and clinicians with a commitment to improve the overall  
423 quality of care received by children and adolescents attending CAMHS in New Zealand, by  
424 demonstrating *improved clinical outcomes and increased delivery of EBT*.

425

426 We have used Donabedian's framework (a method of assessing the quality of healthcare) of  
427 structure, process and outcome (37) to determine the potential impact of delivering MATCH in  
428 New Zealand. In this study our focus is on outcomes and process.

### 4.1 Primary hypotheses:

430 The primary hypotheses are that training CAMHS clinicians in MATCH compared with UC will:

- 431 1. Improve clinical outcomes for children and adolescents accessing CAMHS [*outcomes*]  
432 (measured by comparing difference in trajectory of change of clinical severity (i.e.  
433 which group improves more quickly));
- 434 2. Increase the delivery of evidence-based therapy (EBT) [*process*] (measured by EBT  
435 content of audiotaped therapy sessions);
- 436 3. Yield equal or better efficiency of service delivery [*process*] (measured by clinician  
437 minutes to deliver therapy and duration (in weeks) of contact with the service by  
438 children, adolescents and their families).

### 4.2 Study design:

440 A pragmatic multi-site randomised controlled effectiveness trial (RCT) comparing MATCH with  
441 UC (i.e. the therapies usually used in secondary child and adolescent mental health services).

442

443 We intend to recruit approximately 60 clinicians from several CAMHS teams (from various  
444 DHBs) to deliver treatment to 400 child or adolescent participants over a 15 month period. Of  
445 these 400 participants, approximately one quarter (i.e. 100 participants) will be Māori and one  
446 quarter (i.e. 100 participants) will be Pacific.

447

448 **4.2 Amendment (June 2015):** Sample size reduced to at least 200 participants in the overall  
449 group, with no specific Māori or Pacific targets.

### 4.3 Inclusion and exclusion criteria – child and adolescent participants

451 *Criteria for inclusion:* Children and adolescents will be eligible for inclusion in the trial if:

- 452 • They are newly referred to a participating CAMHS with a primary disorder that includes  
453 anxiety, depression, trauma-related symptoms or disruptive behaviour;
- 454 • They are 7 to 14 years of age on the date of consent;
- 455 • They are able to provide written consent (or verbal assent) and have written  
456 parental/guardian consent; and,



- 457       • The child and their parent/guardian can speak English or there is a clinician who can  
458       provide the necessary treatment, according to the treatment arm the participant is  
459       randomised to, in the family's native language.  
460

461 *Exclusion criteria:* Children and adolescent will be ineligible for inclusion in the trial if:

- 462       • They are currently receiving other treatment for their disorder from the CAMHS (or  
463       another service); or,  
464       • They do not have a primary disorder of psychosis, severe intellectual disability, attention  
465       deficit-hyperactivity disorder (where the primary reason for referral is inattention  
466       and/or over-activity), autism or other pervasive developmental disorder, anorexia  
467       nervosa or bulimia nervosa;  
468       • The young person is acutely suicidal; or,  
469       • They have a sibling that has previously been recruited into the study.

#### 470 **4.4 Inclusion and exclusion criteria – CAMHS clinicians**

471 *Criteria for inclusion:* Clinicians will be eligible for inclusion in the trial if:

- 472       • They are involved in the assessment and clinical treatment of children and adolescents  
473       and their families at participating CAMHS. We anticipate that most clinicians will be  
474       nurses, social workers and psychologists (with some occupational therapists,  
475       psychotherapists and medical practitioners).  
476       • The clinician is full-time (or at least 0.6 FTE); and,  
477       • The clinician anticipates working at the CAMHS for at least 15 months after the MATCH  
478       training is provided.  
479

480 *Exclusion criteria:* Clinicians will be ineligible to inclusion in the trial if:

- 481       • They provide non-clinical support, rather than assessment or treatment. For example,  
482       cultural advisors or youth workers who provide non-clinical interventions.

#### 483 **4.5 Recruitment:**

484 Recruitment will be via CAMHS clinicians. Eligible participants will be invited to participate by a  
485 clinician whom they have met.

#### 486 **4.6 Screening eligibility check:**

487 Potential participants will be identified by CAMHS clinicians during their standard initial  
488 assessment (or intake assessment). Those children and adolescents with primary disorder that  
489 includes anxiety, depression, trauma-related symptoms or disruptive behaviour aged 7 to 14  
490 years old will be invited to participate.

#### 491 **4.7 Participant information and consent:**

492 Child and adolescent participants and their parents/caregivers will be given written information  
493 sheets and consent forms. Written consent will be collected from all parents/caregivers.

494 Written consent (or verbal assent for younger participants) will be collected from all child or  
495 adolescent participants. Consent or assent will be sought from children and adolescents  
496 depending on their developmental stage. This will be done on a case-by-case basis and  
497 determined by the clinician. Those who do not want to participate will receive the care that is  
498 usually provided in that service.

#### 499 **4.8 Baseline assessments:**

500 The following baseline data will be collected before the child/adolescent starts treatment:

- 501 • Demographics;
- 502 • SDQ;
- 503 • BPM;
- 504 • TPA;
- 505 • DAWBA; and,
- 506 • Child Health Utility (CHU9D).

507

508 The following information will be collected from the child's/adolescent's CAMHS clinician:

- 509 • Child's/adolescent's medication use-

510

511 Self-rated assessments will be read out to children and young people who may have difficulty  
512 filling out these forms without this assistance.

#### 513 **4.9 Randomisation:**

514 *Randomisation will occur on two levels:*

515

- 516 • *Randomisation of clinicians:* All clinicians from participating CAMHS teams will be invited  
517 to participate. Consenting CAMHS clinicians will be block randomised (by service/team)  
518 in a 1:1 ratio to MATCH or UC. The block size will vary across sites depending upon the  
519 number of individuals likely to be recruited from each site. Clinicians will be stratified  
520 on the basis of previous evidence-based therapy training (i.e. those with versus those  
521 without accredited training in cognitive behavioural therapy or behavioural parent  
522 training).

523

- 524 • *Randomisation of child and adolescent participants:* After the eligibility check, and once  
525 consent/assent and collection of baseline assessments have been completed,  
526 participants will be randomised in a 1:1 ratio to receive MATCH or UC stratified by sex  
527 and ethnicity.

528

529 Allocation concealment will be assured by using centralised computer generation of the  
530 randomisation sequence.

531

532 We will use web-based randomisation procedures to determine treatment allocation.

**533 4.10 Blinding:**

534 The assessors of the outcome measure/s (i.e. those completing the BPM and DAWBA with  
535 participants) will be blind to treatment allocation. Those research assistants administering the  
536 assessments (i.e. BPM and DAWBA) will not have access to any data that may unblind them.  
537 Due to the nature of the intervention (i.e. MATCH) and UC, it will be obvious to clinicians which  
538 treatment they are providing. Assessor blinding will be maintained by ensuring that the  
539 research assistants (who will collect assessment data) will be unaware of treatment allocation.

**540 4.11 Study intervention:**

541 *MATCH (intervention)* consists of a manual and a training package (i.e. six days of block training  
542 and a year of weekly telephone/Skype consultation sessions from a MATCH trainer to support  
543 clinicians in the use of MATCH). MATCH was specifically designed to combine the effective  
544 elements of the EBTs for anxiety, depression, trauma-related symptoms and disruptive  
545 behaviour in one protocol, cater for co-morbidity and provide an opportunity to address  
546 different disorders that may emerge during therapy. MATCH is comprised of 33  
547 modules/specific treatment procedures which can be organised in a flexible manner.  
548 Children/adolescents and their families are also given an integral role in defining the goals of  
549 therapy. Clinicians use a web-based system (specifically developed for this study) to monitor  
550 progress and adapt therapy (The TrACY eMonitor) in consultation with a child/adolescent and  
551 their family until a problem is resolved.

552  
553 *Usual care/UC (control) group:* Usual care will be the treatment that is usually provided to a  
554 child/adolescent at a CAMHS (e.g. case management, therapeutic group work and  
555 psychotherapy). Information on what UC was provided to each child/adolescent participant  
556 will be collected. A random sub-set of audio recorded therapy sessions will also be reviewed  
557 for content of EBT.

**558 4.12 Outcome measures:**

559 The outcome measures have been chosen carefully to ensure that they have robust  
560 psychometric properties and to reduce the burden for children, their families and clinicians.

561  
562 *Primary outcome measures:*

563 Clinical outcome measure. The Brief Problem Monitor (BPM) is based on the Brief Problem  
564 Checklist (42) and will be collected weekly. The BPM is a 19-item assessment using data from  
565 parents and children to measure internalising, externalising, hyperactivity and total problems.  
566 It was developed from the widely used Child Behavior Checklist (CBCL) and Youth Self Report  
567 (YSR) (43). The BPM has sound psychometric properties (42). It can be administered by phone  
568 or face-to-face and takes approximately five minutes to complete, making it a practical and  
569 robust measure of the trajectory of change in clinical symptoms over time.

570  
571 Delivery of EBT. All MATCH and UC therapy sessions will be audiotaped. A randomly selected  
572 subset approximately 5-10 % (both MATCH and UC) will be assessed by the research team

573 (blind to treatment allocation) for EBT content using the methods and the coding system  
574 developed for the initial trial of MATCH (44). We will double-code a subset of the sample to  
575 check inter-rater agreement (i.e.  $\kappa > 0.70$ ).

576 Efficiency of services. Comparisons will be made between MATCH and UC for the following:  
577 Total therapy input by clinicians (in minutes), contact with the CAMHS (in weeks), number of  
578 therapy sessions and number of missed therapy sessions.

579

580 *Secondary outcome measures:*

581 • The Strengths and Difficulties Questionnaire (SDQ) (38) will be collected monthly over  
582 the phone. The SDQ for children aged 4 to 16 years is widely used in both research and  
583 practice in New Zealand and elsewhere (38). It is was the preferred tool for parents and  
584 children in a New Zealand study of child/youth mental health outcome measures (39). It  
585 produces a total score with five subscales: emotional symptoms; conduct problems;  
586 hyperactivity; peer relationship problems; and prosocial behaviour. Total scores of 17 or  
587 above suggest likely cases with mental health disorders (40). It has satisfactory internal  
588 consistency, test–retest reliability, and inter-rater agreement (41).

589 • The Top Problems Assessment (TPA) has been developed to allow the child and family to  
590 identify and provide severity ratings for the three top problems of greatest concern to  
591 them and track progress in addressing these problems. There is good evidence for  
592 reliability, validity, and sensitivity to change (45). It is brief to administer once the top  
593 problems are identified (takes <2 minutes to complete on a weekly basis) and can be  
594 administered by phone.

595 • The Development and Well-Being Assessment (DAWBA) (46, 47) will be used to  
596 determine the number of diagnoses pre- to post-intervention.

597 • Child Health Utility (CHU9D) is a measure of health-related quality of life designed  
598 specifically for children. There are 9 self-rated items that take fewer than 5 minutes to  
599 complete. CHU9D consists of a descriptive system and a set of preference weights,  
600 giving utility values for each health state described by the descriptive system. It allows  
601 for the calculation of quality adjusted life years (QALYs) for use in cost utility analysis  
602 (49).

603

604 *Other measures*

605 We will collect data on the treatment provided in usual care, the child's/adolescent's  
606 psychotropic medication use and clinician rated serious adverse events (SAEs). The Therapist  
607 Satisfaction Inventory (TSI) (50) will be used to determine clinicians' satisfaction with therapy.  
608 Brief questionnaires will be used to determine treatment satisfaction amongst child/adolescent  
609 participants, their parents/caregivers as well as CAMHS managers/team leaders.

610

611 *Key informant interviews (Amendment Feb 2016):*

612 Key informant interviews will be carried out face-to face (or by phone if face-to-face is not  
613 possible) in March and April 2016, and will be overseen by Dr. Sue Crengle, co-principal  
614 investigator, with the support of our Māori and Pacific co-investigators.

615

616 During the key informant interviews we will explore the following with appropriate study  
617 clinicians:

- 618 1. Their perspective on the acceptability and appropriateness of MATCH for use with  
619 Māori/Pasifika children and young people (CYP).
- 620 2. The strengths and limitations of MATCH for use with Māori/Pasifika CYP.
- 621 3. What, if any, adaptations clinicians made to the way MATCH was used in the therapy  
622 session to ensure that it was delivered in a culturally appropriate way?
- 623 4. Any recommendations that could be incorporated for use with Māori/Pasifika CYP if  
624 MATCH was implemented nationally.

625

626 During the TrACY trial the clinicians providing MATCH have received supervision from  
627 experienced MATCH therapists who live and work in the USA. We would also like to explore  
628 clinician's experience of this supervision.

- 629 5. How useful was the MATCH supervision?
- 630 6. Were recommendations made during supervision consistent with the kaupapa  
631 (philosophy) and tikanga (practices) used with Māori/Pasifika CYP by the  
632 clinician/service?

633

634 In-depth individual interviews will be conducted with:

- 635 1. Clinicians who work in Kaupapa Māori (KM) and Pasifika (P) services and delivered  
636 MATCH in the trial. These clinicians may or may not be of Māori or Pasifika ethnicity  
637 themselves. However, because they work in Kaupapa Māori and Pasifika services they  
638 are well versed in kaupapa, tikanga and culturally appropriate delivery of care (n = 2 for  
639 KM; n = 2 for P).
- 640 2. Team leaders of the Kaupapa Māori and Pasifika services (n = 3)
- 641 3. Clinicians, working in mainstream services, who delivered MATCH during the trial and  
642 have self-identified as Māori or Pasifika ethnicity (n = 1).

643 With informed consent, all interviews will be digitally (voice) recorded. Transcripts will be  
644 made. Participants will be offered the opportunity to review their transcripts. Multiple  
645 readings will be undertaken. Thematic analysis, using an inductive approach, will be  
646 undertaken to identify common themes and differences across participants. NVivo will be used  
647 to manage the qualitative data.

648

649

650

651

652

653

654

**Summary schedule of assessments**

| <b>Assessment schedule</b>   | <b>Baseline</b> | <b>During therapy</b> | <b>Post-intervention</b> | <b>Follow-up</b> | <b>Time</b> | <b>Informant</b> |
|------------------------------|-----------------|-----------------------|--------------------------|------------------|-------------|------------------|
| Demographics                 | ✓               |                       |                          |                  | <10 min     | Child & parent   |
| SDQ                          | ✓               | Monthly               | ✓                        | ✓                | <10 min     | Child & parent   |
| BPM                          | ✓               | Weekly                | ✓                        | ✓                | <10 min     | Child & parent   |
| TPA                          | ✓               | Weekly                | ✓                        | ✓                | <2 min      | Child & parent   |
| Satisfaction (clients)       |                 |                       | ✓                        |                  | <10 min     | Child & parent   |
| DAWBA                        | ✓               |                       | ✓                        |                  | 90 min      | Child & parent   |
| CHU9D                        | ✓               |                       | ✓                        | ✓                | <5 min      | Child            |
| Medication use               | ✓               |                       | ✓                        | ✓                | <10 min     | Clinician        |
| Treatment description        |                 | ✓                     |                          |                  | <15 min     | Clinician        |
| SAEs*                        |                 |                       | ✓                        |                  | <10 min     | Clinician        |
| Therapist satisfaction (TSI) |                 |                       | ✓                        |                  | <10 min     | Clinician        |
| Delivery of EBT              |                 | ✓                     |                          |                  | -           | Research team    |
| Efficiency of services       |                 |                       | ✓                        |                  | <10 min     | Clinician        |
| Satisfaction (manager)       |                 |                       | ✓                        |                  | <10 min     | Manager          |

655 \*Some participants will have no SAEs, so this will require no time to complete.

656 **4.13 Research assistants:**

657 We will employ a number of research assistants to conduct many of the assessments. In  
658 particular the research assistants will conduct the phone assessments (i.e. SDQ, BPM and TPA)  
659 and will assist families to complete the DAWBA. The research assistants will have a  
660 health/mental health qualification (ideally NZ registered health professionals) and have  
661 experience working with children and adolescents. They will be trained in the administering of  
662 the weekly assessments and DAWBA. Ongoing supervision and monitoring will be provided to  
663 ensure the fidelity of data collection. Double-data entry will be conducted on a random sample  
664 of assessments to ensure accuracy.

665 **4.14 Safety assessments:**

666 Generally, an adverse event (AE) is defined as any unintended, unfavourable clinical sign or  
667 symptom, any new illness or disease or a deterioration of existing illness or disease whether or  
668 not considered treatment related. For this study clinicians will be asked to record whether a  
669 child/adolescent participant experienced any serious adverse events and these will be  
670 recorded.  
671

672 A serious adverse event is one that:

- 673 • Results in death;
- 674 • Is life-threatening i.e. the patient was, in the opinion of an investigator, at immediate  
675 risk of death from the event as it occurred (it does not include an event that, had it  
676 occurred in a more severe form, might have caused death);
- 677 • Results in persistent or significant disability/incapacity;
- 678 • Requires in-patient hospitalisation or prolongs hospitalisation; or,
- 679 • Is another medically significant event that, based upon appropriate medical  
680 judgement, may jeopardise the patient and may require medical or surgical  
681 intervention to prevent one of the outcomes listed above.

682  
683 All serious adverse events (including increased suicide risk) will be managed by the CAMHS  
684 clinicians and their team as per their District Health Board's usual risk management protocols  
685 and procedures. All serious adverse events (including increased suicide risk) should be reported  
686 to the trial steering committee by the clinician within 24 hours of the clinician being aware of  
687 the serious adverse event. This notification should be by phone call and fax to Associate  
688 Professor Sally Merry (telephone 09 373 7599 ext 86981 or fax 09 373 7013) and should contain  
689 all information available at the time. Further information will be communicated as soon as it  
690 becomes available. The trial steering committee will review all serious adverse events as soon  
691 as possible. However, the clinical responsibility for the care of the clients will remain with the  
692 relevant clinicians at the appropriate CAMHS.

#### 693 **4.15 Statistical considerations:**

694 *Study power:* Overall, 60 clinicians and 400 patients from a range of CAMHS in New Zealand will  
695 provide sufficient power to detect effect sizes of approximately 0.37. This will allow us to detect  
696 clinically significant effects sufficient to justify the resources required to introduce MATCH in  
697 NZ. We have powered the study so that independent analyses undertaken for Māori and  
698 Pacific young people will have sufficient power (80%) to detect moderate effect sizes of  
699 between 0.61 to 0.70 as statistically significant (two-tailed  $\alpha=0.05$ ) (equivalent to the effect  
700 sizes found in the USA (32)). This allows for a 15% attrition rate in clinicians and in clients  
701 (based on 12.3% attrition rate reported in Weisz et al. (32) and an attrition rate of 10% reported  
702 in Merry et al. of a RCT of psychosocial intervention in NZ (51)) and adjustment for the  
703 clustering of patients for each clinician (ICC=0.1). We have assumed approximately 8 patients  
704 per clinician (approximately 400 patients). If it transpires that fewer clinicians are available  
705 within the targeted CAMHS, we will increase the number of participants to ensure that we  
706 maintain this level of statistical power. We will recruit approximately 12 clinicians working in  
707 Kaupapa Māori services and 12 clinicians working in Pacific services and will investigate effects  
708 by service type. The findings will be complemented by data on acceptability, engagement and  
709 drop-out rates which will be assessed by ethnicity.

710

711 **4.15 Amendment (June 2015). Revised sample size and study power:** Sample size reduced  
712 to at least 200 participants in the overall group, with no specified Māori or Pacific targets.

713 Because of the difficulties with recruitment, a revised power calculation was carried out in  
714 January 2015. By treating the whole group as a single cohort, a sample size of 200 (100 per  
715 treatment arm) will provide sufficient power (80%) to detect moderate effect sizes of  
716 approximately 0.5 to 0.55 as statistically significant (two-tailed  $\alpha=0.05$ ) for the comparison  
717 of outcome measures. These calculations are based on interim analyses of the first 45  
718 completed cases and use a valid estimation of overall variability and acknowledgement of a  
719 meaningful change in the primary outcome measure (a different of at least 2 points on  
720 externalising and internalising subscales of the BPM).

721  
722 We were unable to reach our target recruitment in Kaupapa Māori services (11 clinicians,  
723 but only 4 who remained in the study and were able to recruit participants) or Pacific  
724 services (5 clinicians). Consequently, we are unable to investigate effects by service type.  
725

726 *Analysis of costs:* We will compare costs between MATCH and UC using cost-per-hour of  
727 clinician time, and will discuss these findings in terms of likely ongoing impact of untreated  
728 disorder using information from published studies. Although we are collecting the relevant  
729 data, we do not have the resources to undertake a formal analysis of costs in this study. If there  
730 are positive results from the study, we will apply for funds to do a detailed cost-benefit analysis.  
731

732 *Analyses:*

733  
734 Intention-to-treat analyses will be carried out and will include all participants who met inclusion  
735 criteria and provided and maintained written informed consent prior to treatment  
736 commencing.

737  
738 Per-protocol analyses will include participants who completed the study (i.e. not withdrawn),  
739 received therapy as per their allocated treatment group (i.e. not treated “off protocol”) and had  
740 at least four completed therapy sessions.

741  
742 We will assess the comparability of baseline of both treatment groups (i.e. MATCH and UC)  
743 using descriptive analyses, in terms of age, sex, pre-intervention BPM and SDQ data, diagnosis  
744 and ethnicity. Both treatments may vary in content and duration, so that pre-post and follow-  
745 up (three months after treatment has ended) analyses are potentially confounded by treatment  
746 duration and/or dose. To deal with this, we propose to use the trajectories of change across  
747 time on the BPM as our primary outcome measure. Intention to treat analyses will be carried  
748 out and will include all participants who meet inclusion criteria, and provide and maintain  
749 written informed consent prior to treatment commencing.

750  
751 *Primary outcomes:*

752 i. Clinical outcomes:

753  
754 Difference between groups on the BPM (internalising and externalising scales) will  
755 be compared using differences in trajectories of change across time using a mixed  
756 effects regression model with outcome  $=a_0(\text{intercept}) + a_1(\text{informant}) + a_2(\text{treatment})$



757 group) +  $a_3(\text{time}) + a_4(\text{treatment} \times \text{time})$  and intercept, informant and time (log day)  
758 treated as random effects.

759

760 These analyses will be adjusted for:

- 761 • Medication use,
- 762 • Ethnicity,
- 763 • Clinician site, and
- 764 • Adjustment for clinician's previous evidence-based therapy training.

765

766 The addition of the ethnicity and the treatment x time x ethnicity terms to the  
767 model above will allow formal statistical testing of the consistency of the treatment  
768 effects across ethnicity groups. It is acknowledged that the power for these  
769 comparisons will be much reduced compared to the testing of the overall treatment  
770 effect and the possibility of type II error in relation to clinically significant  
771 differences is somewhat higher. No comparisons between ethnic groups will be  
772 made.

773

774 ii. Delivery of EBT. The percentage of EBT content in a random sub-set of sessions  
775 assessed by coding audio-taped therapy sessions will be compared between groups  
776 using ANOVA following the method used in the USA trial (44).

777

778 iii. *Efficiency of services.* Efficiency in delivery of therapy for MATCH and UC will be  
779 compared using ANOVA to test for significant differences using the following data  
780 which will be collected from the clinical service including:

- 781 • Clinician time (in minutes);
- 782 • Duration of contact with the service (in weeks).
- 783 • Number of therapy sessions;
- 784 • Number of missed therapy sessions.

785

786 *Secondary outcomes:*

787

- 788 • Trajectory of change adjusted as above for the SDQ (total problems score; measured  
789 monthly) and Top Problems Assessment (measured weekly);
- 790 • Post-treatment diagnoses (number), controlling for pre-treatment diagnoses. A fixed-  
791 effects analysis of covariance model will be applied to all children and adolescents for  
792 whom we have both pre- and post-treatment data on diagnosis using DAWBA. Where a  
793 DAWBA assessment is missing it will be assumed that there has been no change.  
794 Remission and reductions of DAWBA diagnoses (“++”, “+++” or less), total numbers of  
795 DAWBA diagnoses pre- to post-intervention, and diagnoses by treatment arm pre- to  
796 post-intervention will also be calculated.
- 797 • Changes in the Child Health Utility (CHU9D) assessment will be compared across arms  
798 using ANOVA to assess changes between baseline, discharge and at follow-up across  
799 treatment groups.

800

801 *Other measures:*

802

803 • An evaluation of satisfaction with the treatment (MATCH or UC) compared using ANOVA  
804 and rated by:

805 a) child/adolescent;

806 b) parent/care-giver;

807 c) clinicians; and

808 d) CAMHS manager/team leaders.

809

810 • Clinician rated severe adverse events will be described in each group. The numbers are  
811 likely to be too small to allow useful statistical comparisons. Moderate adverse events  
812 (gathered by the study research assistants at the three month follow-up) will be  
813 described in each group.

814

815 • Treatment description (based on the Therapy Procedures Checklist-FR);

816

817 • Child's/adolescent's psychotropic medication use;

#### 818 **4.16 Bias:**

819 Due to the nature of the study intervention, this trial can only be participant and assessor-blind.

820 Clinicians will be aware of treatment allocation and some child/adolescent participants may be

821 unblinded to treatment allocation. Research assistants collecting weekly data and will assist

822 families to complete the DAWBA diagnostic assessments will be blind to group allocation.

#### 823 **4.17 Interim analysis:**

824 An interim analysis is planned after child and adolescent participants recruited in the first six

825 months of the study have completed post-intervention assessments. This analysis will compare

826 treatment arms with respect to the primary outcome variable and serious adverse events. The

827 steering committee will consider the relative efficacy and rates of serious adverse events in the

828 two treatment arms and will determine on this basis, if it is appropriate for the study to

829 continue or not.

830

831 The DMC will consider the relative safety and efficacy and rates of serious adverse events in the

832 two treatment arms and make recommendations to the Steering Committee regarding

833 continuation or termination of the study.

#### 834 **4.18 Withdrawal criteria:**

835 Participants can withdraw from the study at any time. Those participants that remain in the

836 study, but have dropped out of treatment, will still be followed up wherever possible.

837

838 Where a clinician withdraws from the study, a clinician from the same treatment arm will  
839 continue to provide the treatment allocated (i.e. either MATCH or usual care). If the participant  
840 was randomised to MATCH, and their allocated MATCH clinician withdraws from the study with  
841 no one else is available within the team to offer MATCH, then MATCH will be delivered by the  
842 MATCH professional support person in that service.

843 **4.19 Ethics committee approval:**

844 Ethics committee approval for this study will be sought from the Health and Disability Ethics  
845 Committees and the appropriate locality approval will be obtained from each participating site.

846 **4.20 Dissemination of results:**

847 All study participants (clinicians, children/adolescents and parents/caregivers) who indicated  
848 that they would like a brief summary of the results will be sent this summary, along with an  
849 outline of their significance and our future research and workforce development plans for  
850 MATCH in NZ. Study findings will be discussed at New Zealand meetings, hui and fono as well  
851 as at international conferences. Publication of papers in international journals will be sought.

852 **4.21 Trial registration:**

853 The trial has been registered with the Australian New Zealand Clinical Trials Registry  
854 ACTRN12614000297628.  
855

856

## 5. Administration

### 857 5.1 Study management:

858 The co-principal investigators are primarily responsible for the conduct of the study. The  
859 principal investigators will facilitate the trial steering committee and study management  
860 committee.

### 861 5.2 Trial steering committee:

862 The trial steering committee will consist of the study investigators and at least two New  
863 Zealand experts in the field of child and adolescent mental health. It is responsible for  
864 providing strategic guidance for the trial, including developing and maintaining the study  
865 design, approval of protocol changes, statistical analyses, presentation and publication of  
866 results. The committee will meet at least quarterly (or more frequently if required) and will be  
867 conducted using video conference at a time suitable for our American investigators (to allow for  
868 those outside of Auckland) to easily access meetings. The committee will review information  
869 relating to recruitment and serious adverse events, plus any problems and issues raised by the  
870 study management committee. The trial steering committee will review data from the planned  
871 interim analysis and recommend whether the study continues or is terminated.

872

873 All serious adverse events will be reviewed by at least two or three of the clinicians on the trial  
874 steering committee (i.e. Associate Professor Sally Merry, Dr Sue Crengle, Professor John Weisz,  
875 Dr Ainsleigh Cribb-Su'a, Dr Jik Loy, Assistant Professor Sarah Kate Bearman, Dr Ana Ugueto, Dr  
876 Jenny Herren, Dr Monique Faleafa and Dr Mathijs Lucassen) to establish whether these could  
877 be related to the treatment received. If they have any concerns they will forward the  
878 information to the full trial steering committee. In addition this information (even if no  
879 concerns are raised during the initial review) will be reviewed at the regular trial steering  
880 committee meetings.

### 881 5.3 Study management committee:

882 The study management committee consists of Associate Professor Sally Merry, Dr Sue Crengle,  
883 Dr Karolina Stasiak, Dr Mathijs Lucassen (1 Oct 2013 - 1 June 2015), and Dr Sarah Hopkins (1  
884 June 2015 – 30 September 2016) who are involved in the daily operation of the study, and will  
885 review study materials, deal with study problems, recruitment and logistical issues.

### 886 5.4 MATCH training group:

887 MATCH face-to-face training will be provided by the MATCH trainers from Professor Weisz's  
888 team (i.e. Assistant Professor Sarah Kate Bearman, Dr Ana Ugueto and Dr Jenny Herren) in New  
889 Zealand. The MATCH trainers will provide weekly group consultation sessions (via telephone or  
890 Skype) on the use of MATCH for the duration of study recruitment and the active treatment of  
891 child and adolescent participants (estimated to be 15 months). Professor John Weisz will  
892 provide oversight to ensure that the MATCH training and consultation provided to New Zealand

893 clinicians meets the necessary standards. Dr Ainsleigh Cribb-Su'a (or a delegate) will provide  
894 support and supervision to the MATCH consultants to help ensure MATCH training and  
895 consultation sessions are responsive to the needs to Māori. Dr Monique Faleafa (or a delegate)  
896 will provide support and supervision to the MATCH consultants to help ensure MATCH training  
897 and consultation sessions are responsive to the needs to Pacific participants in the study.

#### 898 **5.5 Protocol, participant information sheets and other revisions:**

899 Any protocol deviations will be documented. All revisions to the protocol will be discussed and  
900 approved by the study management committee. If the revision is an "administrative letter",  
901 one of the co-principal investigators will sign it and submit it to the ethics committee for their  
902 information. If the revision is an "amendment", one of the co-principal investigators will sign it  
903 and submit it to the ethics committee for review and approval prior to implementation.  
904 Documentation of approval signed from the chairperson or designee of the ethics committee  
905 will be sent to the co-principal investigators.  
906

907 If an amendment alters the study such that the participant information sheet (PIS) needs to be  
908 updated:

- 909 • The PIS/consent form will be revised and submitted to the ethics committee for review  
910 and approval;
- 911 • The revised PIS form will be posted to participants; and,
- 912 • The new PIS/consent form will be used for new participants as soon as it is approved by  
913 the ethics committee.

#### 914 **5.6 Reporting:**

915 The co-principal investigators will provide annual reports to the ethics committee and the  
916 funder (the Health Research Council).

#### 917 **5.7 Record retention and security:**

918 The co-principal investigators will not dispose of any records relevant to this study until 10  
919 years after the study completion. The investigators shall take responsibility for maintaining  
920 adequate and accurate hard copy source documents of all data generated during this study and  
921 will be securely stored in locked premises at the University of Auckland. Electronic data will be  
922 securely stored, using participant codes (except for the form pertaining to demographics) and  
923 will be password protected. Participating CAMHS clinicians will have access to clinically  
924 relevant data (e.g. a weekly summary of how their participating child/adolescent client is  
925 progressing), however they will not have access to the raw data.  
926

**927 5.8 Ownership of data and publication policy:**

928 The data from this study remain the property of the investigators. All publications from this  
929 study should be approved by the trial steering committee. It is intended that the results of this  
930 study will be presented at appropriate conference/s and published in peer-reviewed journals,  
931 regardless of the outcome of the study.

**932 5.9 Confidentiality:**

933 All information generated in this study is considered highly confidential and will not be  
934 disclosed to any persons not directly concerned with the study. Documents and data will be  
935 stored securely with controlled access to prevent loss, tampering or unauthorised access.  
936 Documentation for the study will be managed according to the University of Auckland's  
937 research policy. Data will be destroyed after 10 years according to standard research practice.

**938 5.10 Quality control and assurance:**

939 Each study site/CAMHS will be monitored on a regular basis to ensure integrity of the data  
940 supplied.

**941 5.11 MATCH training for UC CAMHS clinicians:**

942 Each participating UC CAMHS clinician will be offered the opportunity to receive MATCH  
943 training once all participants have been recruited and these participants have finished  
944 treatment.

945

946

947

948

949

950

951

## 6. References

- 952 1. Fergusson DM, Horwood JL. The Christchurch health and development study: review of  
953 findings on child and adolescent mental health. *Australian and New Zealand Journal of*  
954 *Psychiatry*. 2001;35:287-96.
- 955 2. Costello JE, Mustillo S, Erkanli A, Keeler G, Angold A. Prevalence and development of  
956 psychiatric disorders in childhood and adolescence. *Archives of General Psychiatry*.  
957 2003;60(8):837-44.
- 958 3. Sawyer MG, Arney FM, Baghurst PA, Clark JJ, Graetz RJ, Kosky R, Nurcombe B, Patton  
959 GC, Prior MR, Raphael B, Rey JM, Whaites LC, Zubrick SR. The mental health of young  
960 people in Australia: key findings from the child and adolescent component of the  
961 national survey of mental health and well-being. *Australian and New Zealand Journal of*  
962 *Psychiatry*. 2001;35.
- 963 4. Anderson JC, Williams S, McGee R, Silva PA. DSM-III disorders in preadolescent children:  
964 Prevalence in a large sample from the general population. *Archives of General*  
965 *Psychiatry*. 1987;44(1):69-76.
- 966 5. Prime Minister's Chief Science Advisor. *Improving the Transition: Reducing Social and*  
967 *Psychological Morbidity During Adolescence*. Wellington: Office of the Prime Minister's  
968 Science Advisory Committee 2011.
- 969 6. Belfer ML. Child and adolescent mental disorders: The magnitude of the problem across  
970 the globe. *Journal of Child Psychology and Psychiatry*. 2008;49(3):226-36.
- 971 7. Minister of Health. *Te Tāhuhu - Improving Mental Health 2005-2015: The Second New*  
972 *Zealand Mental Health and Addiction Plan*. Wellington: Ministry of Health; 2005.
- 973 8. Minister of Health. *Te Kōkiri: The Mental Health and Addiction Action Plan 2006-2015*.  
974 Wellington: Ministry of Health; 2006.
- 975 9. Ministry of Health. *Te Raukura - Mental health and alcohol and other drugs: Improving*  
976 *outcomes for children and youth*. Wellington: Ministry of Health; 2007.
- 977 10. Weisz JR. *Psychotherapy for children and adolescents: Evidence-based treatments and*  
978 *case examples*. Cambridge, UK: Cambridge University Press; 2004.
- 979 11. Weisz JR, Kazdin AE, editors. *Evidence-based psychotherapies for children and*  
980 *adolescents (2nd ed.)*. New York, NY: Guilford Press; 2010.
- 981 12. Weisz JR, Hawley KM, Jensen Doss A. Empirically tested psychotherapies for youth  
982 internalizing and externalizing problems and disorders. *Child and Adolescent Psychiatric*  
983 *Clinics of North America*. 2004;13(2004):729-815.
- 984 13. Weisz JR, Jensen Doss A, Hawley KM. Youth psychotherapy outcome research: A review  
985 and critique of the evidence base. *Annual Review of Psychology*. 2005;56(1):337-63.
- 986 14. Fixsen DL, Naoom SF, Blase KA, Friedman R, Wallace F. *Implementation research: A*  
987 *synthesis of the literature*. Tampa, FL: University of South Florida, Louis de la Parte  
988 Florida Mental Health Institute, The National Implementation Research Network; 2005.
- 989 15. Weisz JR, Jensen-Doss A, Hawley KM. Evidence-based youth psychotherapies versus  
990 usual clinical care: A meta-analysis of direct comparisons. *American Psychologist*.  
991 2006;61(7):671-89.
- 992 16. Weisz J, Southam-Gerow M, Gordis E, Connor-Smith J, Chu B, Langer D, McLeod B,  
993 Jensen-Doss A, Updegraff A, Weiss B. Cognitive-behavioral therapy versus usual clinical

- 994 care for youth depression: an initial test of transportability to community clinics and  
995 clinicians. *Journal of Consulting and Clinical Psychology*. 2009;77(3):383-96.
- 996 17. Mental Health Commission. The funding needed for mental health services in New  
997 Zealand. Wellington: Mental Health Commission; 1998.
- 998 18. The Werry Centre. 2010 Stocktake of Infant, Child and Adolescent Mental Health and  
999 Alcohol and Other Drug Services in New Zealand. Auckland: The Werry Centre for Child  
1000 & Adolescent Mental Health Workforce Development, The University of Auckland; 2011.
- 1001 19. Peters J. Undergraduate training in child and adolescent mental health: A review.  
1002 Auckland: Werry Centre for Child and Adolescent Mental Health, University of Auckland;  
1003 2003.
- 1004 20. Strupp HH, Anderson T. On the limitations of therapy manuals. *Clinical Psychology:  
1005 Science and Practice*. 1997;4(1):76-82.
- 1006 21. Westen D, Novotny CM, Thompson-Brenner H. The empirical status of empirically  
1007 supported psychotherapies: Assumptions, findings, and reporting in controlled clinical  
1008 trials. *Psychological Bulletin*. 2004;130(4):631-63.
- 1009 22. Westen D, Novotny CM, Thompson-Brenner H. The next generation of psychotherapy  
1010 research: Reply to Ablon and Marci (2004), Goldfried and Eubanks-Carter (2004), and  
1011 Haaga (2004). *Psychological Bulletin*. 2004;130(4):677-83.
- 1012 23. Baxter J, Kingi TK, Tapsell R, Durie M, McGee MA. Prevalence of mental disorders among  
1013 Maori in Te Rau Hinengaro: the New Zealand Mental Health Survey. *Australian & New  
1014 Zealand Journal of Psychiatry*. 2006;40(10):914-23.
- 1015 24. Adolescent Health Research Group. Te Ara Whakapipi Taitamariki: Maori Specific  
1016 Findings of Youth2000: The University of Auckland2004.
- 1017 25. Rasanthan K, Ameratunga S, Chen J, Robinson E, Young W, Wong G, Garret N, Watson  
1018 PD. A health profile of young Asian New Zealanders who attend secondary school:  
1019 Findings from Youth2000: The University of Auckland2006.
- 1020 26. MacMillan HL, MacMillan AB, Offord DR, Dingle JL. Aboriginal health. *Canadian Medical  
1021 Association Journal*. 1996;155:1569-78.
- 1022 27. Trewin D, R M. The Health and Welfare of Australia's Aboriginal and Torres Strait  
1023 Islander Peoples. Canberra: Australian Bureau of Statistics; 2005.
- 1024 28. Baxter J, Kokaua J, Wells JE, McGee MA, Browne MAO. Ethnic comparisons of the 12  
1025 month prevalence of mental disorders and treatment contact in Te Rau Hinengaro: the  
1026 New Zealand Mental Health Survey. *Australian & New Zealand Journal of Psychiatry*.  
1027 2006;40(10):905-13.
- 1028 29. Health Workforce New Zealand 2011 [cited 2011]. Towards the next wave of mental  
1029 health & addiction services and capability workforce service review report. Available  
1030 from: <http://healthworkforce.govt.nz>.
- 1031 30. Weisz J, Weiss B, Han S, Granger D. Effects of psychotherapy with children and  
1032 adolescents revisited: a meta-analysis of treatment outcome studies. *Psychological  
1033 Bulletin*. 1995;117:450-68.
- 1034 31. Weisz J, McCarty C, Valeri S. Effects of psychotherapy for depression in children and  
1035 adolescents: A meta-analysis. *Psychological Bulletin*. 2006;132(1):132-49.
- 1036 32. Weisz J, Chorpita B, Palinkas L, Schoenwald S, Miranda J, Bearman S, Daleiden E, Ugueto  
1037 A, Ho A, Martin J, Gray J, Alleyne A, Langer D, Sotham-Gerow M, Gibbons R, the



- 1038 Research Network on Youth Mental Health. Testing standard and modular designs for  
1039 psychotherapy treating depression, anxiety, and conduct problems in youth: A  
1040 randomized effectiveness trial. *Archives of General Psychiatry*. 2012;69(3):274-82.
- 1041 33. Statistics New Zealand. Ethnic population projections: Issues and trends. Wellington:  
1042 Statistics New Zealand; 2004.
- 1043 34. Statistics New Zealand. National Ethnic Population Projections: 2006 (base) - 2026  
1044 Wellington: Statistics New Zealand; 2010.
- 1045 35. Ramage C, Bir J, Towns A, Vague R, Cargo T, Niumata-Faleafa M. Stocktake of child and  
1046 adolescent mental health services in New Zealand. Auckland: The Werry Center for Child  
1047 and Adolescent Mental Health Workforce Development 2005.
- 1048 36. Fergusson D, Poulton R, Horwood J, Miln B, Swain-Campbell N. Comorbidity and  
1049 Coincidence in the Christchurch and Dunedin Longitudinal Studies. Wellington: A report  
1050 for the New Zealand Ministry of Social Development, Ministry of Education and the  
1051 Treasury; 2003.
- 1052 37. Donabedian A. The quality of care: How can it be assessed? *JAMA*. 1988;260(12):1743-8.
- 1053 38. Goodman R. The Strengths and Difficulties Questionnaire: A research note. *Journal of*  
1054 *Child Psychology and Psychiatry*. 1997;38:581-6.
- 1055 39. Merry S, Stasiak K, Parkin A, Seymour F, Lambie I, Crengle S, Pasene-Mizziebo E. Child  
1056 and youth outcome measures: examining current use and acceptability of measures in  
1057 mental health services and recommending future directions. Auckland: The Mental  
1058 Health Research and Development Strategy 2004.
- 1059 40. Goodman R. The Strengths and Difficulties Questionnaire: A research note. *Journal of*  
1060 *Child Psychology and Psychiatry*. 1997;38:581-6.
- 1061 41. Stone LL, Otten R, Engels RCME, Vermulst AA, Janssens JMAM. Psychometric properties  
1062 of the parent and teacher versions of the Strengths and Difficulties Questionnaire for 4-  
1063 to 12-year-olds: A review. *Clinical Child & Family Psychology Review*. 2010;13:254-74.
- 1064 42. Chorpita B, Reise S, Weisz J, Grubbs K, Becker K, Krull J, The Research Network on Youth  
1065 Mental Health. Evaluation of the brief problem checklist: Child and caregiver interviews  
1066 to measure clinical progress. *Journal of Consulting and Clinical Psychology*.  
1067 2010;78(4):526-36.
- 1068 43. Achenbach TM. Manual for the Child Behaviour Checklist/4-18 and 1991 profile.  
1069 Burlington, VT: Department of Psychiatry, University of Vermont 1991.
- 1070 44. Weisz J, Chorpita B, Palinkas L, Schoenwald S, Miranda J, Bearman S, Daleiden E, Ugueto  
1071 A, Ho A, Martin J, Gray J, Alleyne A, Langer D, Sotham-Gerow M, Gibbons R, the  
1072 Research Network on Youth Mental Health. Testing standard and modular designs for  
1073 psychotherapy treating depression, anxiety, and conduct problems in youth: A  
1074 randomized effectiveness trial - Supplementary Online Content. *Archives of General*  
1075 *Psychiatry*. 2011;Online First:1-4.
- 1076 45. Weisz J, Chorpita B, Frye A, Ng M, Lau N, Bearman S, Ugueto A, Langer D, Hoagwood K.  
1077 Youth top problems: Using idiographic, consumer-guided assessment to identify  
1078 treatment needs and to track change during psychotherapy. *Journal of Consulting and*  
1079 *Clinical Psychology*. 2011;79(3):369-80.
- 1080 46. Goodman R, Ford T, Richards H, Gatward R, Meltzer H. The development and well-being  
1081 assessment : Description and initial validation of an integrated assessment of child and

- 1082 adolescent psychopathology. *Journal of Child Psychology and Psychiatry*.  
1083 2001;41(5):645-55.
- 1084 47. Ford T, Goodman R, Meltzer H. The British child and adolescent mental health survey  
1085 1999: The prevalence of DSM-IV disorders. *Journal of the American Academy of Child  
1086 and Adolescent Psychiatry*. 2003;42(10):1203-11.
- 1087 48. Garralda E, Yates P, Higginson I. Child and adolescent mental health service use:  
1088 HoNOSCA as an outcome measure. *The British Journal of Psychiatry*. 2000;177:52-8.
- 1089 49. Stevens KJ. Assessing the performance of a new generic measure of health related  
1090 quality of life for children and refining it for use in health state valuation. *Applied Health  
1091 Economics and Health Policy*. 2011;9(3):157-69.
- 1092 50. Addis ME, Krasnow AD. A national survey of practicing psychologists' attitudes toward  
1093 psychotherapy treatment manuals. *Journal of Consulting and Clinical Psychology*.  
1094 2000;68(2):331-9.
- 1095 51. Merry S, Stasiak K, Frampton C, Shepherd M, Fleming T, Lucassen M. A randomised  
1096 controlled non-inferiority trial of the effectiveness of SPARX, a computerised self-help  
1097 intervention for adolescents seeking help for depression. *British Medical Journal*.  
1098 2012;344(e2598).
- 1099  
1100
