# Supplementary material for: Effect of Clinician Training in the Modular Approach to Therapy for Children vs Usual Care on Clinical Outcomes and Use of Empirically Supported Treatments: A Randomized Clinical Trial
Source: PubMed Central journal article supplement (PMC7431993; doi:10.1001/jamanetworkopen.2020.11799), 2020-08-17
Supplement: jamanetwopen-3-e2011799-s002.pdf [file jamanetwopen-3-e2011799-s002.pdf]

## Supplementary Online Content

Merry SN, Hopkins S, Lucassen MFG, et al. Effect of clinician training in the Modular Approach to Therapy for Children vs usual care on clinical outcomes and use of empirically supported treatments: a randomized clinical trial. *JAMA Netw Open*. 2020;3(8):e2011799. doi:10.1001/jamanetworkopen.2020.11799

**eTable 1.** Individual Diagnoses at Baseline by Treatment Group

**eTable 2.** Clinical Outcomes: Baseline, Post-Intervention and Follow-up Scores—Intention-to-Treat Analyses

**eTable 3.** Changes in Individual Diagnoses by Treatment Group

**eTable 4.** Psychotropic Medication Use by Treatment Arm

**eTable 5.** Adverse Events by Treatment Group

**eTable 6.** Initial Treatment Focus by Treatment Group

This supplementary material has been provided by the authors to give readers additional information about their work.

**eTable 1. Individual Diagnoses at Baseline by Treatment Group**

|                                      | <i>MATCH</i> |           |             | <i>Usual Care</i> |           |             |
|--------------------------------------|--------------|-----------|-------------|-------------------|-----------|-------------|
|                                      | Valid        | <i>N</i>  | %           | Valid             | <i>N</i>  | %           |
| <b>Depressive disorder</b>           | <b>58</b>    | <b>14</b> | <b>24.1</b> | <b>73</b>         | <b>13</b> | <b>17.8</b> |
| <b>Anxiety disorder / PTSD</b>       | <b>61</b>    | <b>30</b> | <b>49.2</b> | <b>76</b>         | <b>49</b> | <b>64.4</b> |
| Separation Anxiety                   | 57           | 14        | 24.6        | 72                | 23        | 32.0        |
| Specific Phobia                      | 55           | 12        | 21.8        | 71                | 24        | 33.8        |
| Social Phobia                        | 57           | 8         | 14.0        | 69                | 15        | 21.7        |
| Panic                                | 54           | 1         | 1.9         | 69                | 3         | 4.3         |
| Agoraphobia                          | 54           | 1         | 1.9         | 68                | 3         | 4.4         |
| Generalised Anxiety                  | 59           | 18        | 30.5        | 74                | 21        | 28.4        |
| PTSD                                 | 55           | 0         | 0.0         | 69                | 2         | 2.9         |
| OCD                                  | 55           | 2         | 3.6         | 70                | 4         | 5.7         |
| <b>Disruptive behaviour disorder</b> | <b>51</b>    | <b>19</b> | <b>37.2</b> | <b>71</b>         | <b>19</b> | <b>26.7</b> |
| Oppositional                         | 50           | 19        | 38.0        | 67                | 18        | 26.9        |
| Conduct                              | 51           | 8         | 15.7        | 71                | 8         | 11.2        |
| <b>Other</b>                         | <b>53</b>    | <b>7</b>  | <b>13.2</b> | <b>74</b>         | <b>12</b> | <b>16.3</b> |
| Autistic Spectrum                    | 51           | 1         | 2.0         | 68                | 0         | 0.0         |

|                  |    |   |      |    |   |      |
|------------------|----|---|------|----|---|------|
| Tics             | 50 | 0 | 0.0  | 65 | 2 | 3.1  |
| Hyperactivity    | 52 | 7 | 13.5 | 70 | 9 | 12.8 |
| Anorexia/Bulimia | 51 | 0 | 0.0  | 69 | 1 | 1.4  |

Development and Well-Being Assessment. The presence of disorder was defined as ++ or +++ (50% probability or more). Anxiety/PTSD = Separation Anxiety, Specific Phobia, Social Phobia, Panic, Agoraphobia, Generalised Anxiety, PTSD, OCD. Disruptive behaviour = Oppositional, Conduct.

**eTable 2. Clinical Outcomes: Baseline, Post-Intervention and Follow-up Scores—Intention-to-Treat Analyses**

|                                                      | <i>MATCH</i> |                   |               | <i>Usual Care</i> |                   |               | <i>P Value<br/>(B – PI)</i> | <i>P Value<br/>(PI - FU)</i> |
|------------------------------------------------------|--------------|-------------------|---------------|-------------------|-------------------|---------------|-----------------------------|------------------------------|
|                                                      | Baseline     | Post-intervention | 3mo Follow-up | Baseline          | Post-intervention | 3mo Follow-up |                             |                              |
| <b>Brief Problem Monitor, N</b>                      | 96           | 79                | 73            | 103               | 93                | 85            |                             |                              |
| BPM, Total (0 – 26)                                  | 12.3 (0.4)   | 6.3 (0.4)         | 6.3 (0.4)     | 11.7 (0.4)        | 5.8 (0.4)         | 6.2 (0.3)     | 0.987                       | 0.776                        |
| Internalising (0 – 12)                               | 6.8 (0.2)    | 3.2 (0.3)         | 3.2 (0.2)     | 6.8 (0.2)         | 3.2 (0.3)         | 3.3 (0.2)     | 0.839                       | 0.603                        |
| Externalising (0 – 14)                               | 5.5 (0.2)    | 3.1 (0.3)         | 3.1 (0.2)     | 4.9 (0.2)         | 2.6 (0.2)         | 2.9 (0.2)     | 0.805                       | 0.254                        |
| <b>Strengths &amp; Difficulties Questionnaire, N</b> | 97           | 77                | 72            | 103               | 91                | 86            |                             |                              |
| Total difficulties (0 – 40)                          | 19.0 (0.4)   | 11.5 (0.5)        | 11.4 (0.4)    | 18.3 (0.4)        | 11.5 (0.5)        | 10.8 (0.3)    | 0.374                       | 0.509                        |
| Internalising (0 – 20)                               | 10.3 (0.3)   | 6.0 (0.4)         | 5.7 (0.2)     | 10.2 (0.3)        | 5.9 (0.3)         | 5.5 (0.2)     | 0.851                       | 0.253                        |
| Externalising (0 – 20)                               | 8.7 (0.2)    | 5.5 (0.3)         | 5.7 (0.2)     | 8.1 (0.2)         | 5.7 (0.3)         | 5.3 (0.2)     | 0.199                       | 0.991                        |

All data are reported as means (SE). Abbreviations: BPM, Brief Problem Monitor. P value is for the Treatment\*Time interaction.

**eTable 3. Changes in Individual Diagnoses by Treatment Group**

| Change in number of diagnoses | <i>MATCH (n=39)</i> |      | <i>Usual Care (n=50)</i> |      |
|-------------------------------|---------------------|------|--------------------------|------|
|                               | n                   | (%)  | n                        | (%)  |
| Gained (+3)                   | 0                   | 0.0  | 1                        | 2.0  |
| Gained (+2)                   | 1                   | 2.6  | 3                        | 6.0  |
| Gained (+1)                   | 3                   | 7.7  | 3                        | 6.0  |
| Same                          | 15                  | 38.5 | 11                       | 22.0 |
| Lost (-1)                     | 14                  | 35.9 | 13                       | 26.0 |
| Lost (-2)                     | 2                   | 5.1  | 10                       | 20.0 |
| Lost (-3)                     | 3                   | 7.7  | 6                        | 12.0 |
| Lost (-4)                     | 1                   | 2.6  | 1                        | 2.0  |
| Lost (-5)                     | 0                   | 0.0  | 2                        | 4.0  |

**eTable 4. Psychotropic Medication Use by Treatment Arm**

|                         | <b><i>MATCH</i></b><br><b><i>(n=97)</i></b> |                   | <b><i>Usual Care</i></b><br><b><i>(n=103)</i></b> |                   |
|-------------------------|---------------------------------------------|-------------------|---------------------------------------------------|-------------------|
|                         | <b><i>n</i></b>                             | <b><i>(%)</i></b> | <b><i>n</i></b>                                   | <b><i>(%)</i></b> |
| <b>At Baseline</b>      |                                             |                   |                                                   |                   |
| Taking medication       | 14                                          | (14.4)            | 9                                                 | (8.7)             |
| Missing data            | 7                                           | (7.2)             | 5                                                 | (4.9)             |
| <b>During Treatment</b> |                                             |                   |                                                   |                   |
| No change               | 70                                          | (72.2)            | 79                                                | (76.7)            |
| Added medication        | 15                                          | (15.5)            | 13                                                | (12.6)            |
| Removed medication      | 1                                           | (1.0)             | 1                                                 | (1.0)             |
| Missing data            | 11                                          | (11.3)            | 10                                                | (9.7)             |

**eTable 5. Adverse Events by Treatment Group**

|                                                   | <b><i>MATCH</i></b><br><b><i>(n = 76)</i></b> | <b><i>Usual Care</i></b><br><b><i>(n=88)</i></b> |
|---------------------------------------------------|-----------------------------------------------|--------------------------------------------------|
| <b>Serious Adverse Events</b>                     |                                               |                                                  |
| Suicide attempt – with or without hospitalisation | 4                                             | 1                                                |
| Hospitalisation for non-suicidal self-harm        | 2                                             | 0                                                |
| <b>Moderate Adverse Events</b>                    |                                               |                                                  |
| Hospitalisation for non-mental health issues      | 4                                             | 5                                                |
| Serious behavioural issues                        | 3                                             | 6                                                |
| Use of respite care                               | 1                                             | 2                                                |
| <b>TOTAL</b>                                      | 14                                            | 14                                               |

Examples of hospitalisation responses for non-suicidal self-harm or non-mental health issues: compacted bowel, neck injury & concussion following vehicle accident, overnight stay for blood enzyme deficiency, asthma, playground accident, surgery for kidney issues. Examples of serious behavioural issues: school suspension or expulsion, absconded from home, trouble with police.

**eTable 6. Initial Treatment Focus by Treatment Group**

|                           | <b>MATCH<br/>(n=97)</b> |            | <b>Usual Care<br/>(n=103)</b> |            | <b>Total</b> |
|---------------------------|-------------------------|------------|-------------------------------|------------|--------------|
|                           | <b>n</b>                | <b>(%)</b> | <b>n</b>                      | <b>(%)</b> |              |
| <b>Anxiety</b>            | 48                      | (49.5)     | 67                            | (65.0)     | 115          |
| <b>Depression</b>         | 21                      | (21.6)     | 11                            | (10.7)     | 32           |
| <b>Conduct</b>            | 21                      | (21.6)     | 13                            | (12.6)     | 34           |
| <b>Trauma</b>             | 1                       | (1.0)      | 1                             | (1.0)      | 2            |
| <b>Other <sup>a</sup></b> | 1                       | (1.0)      | 5                             | (4.9)      | 6            |
| <b>Not assessed</b>       | 5                       | (5.2)      | 6                             | (5.8)      | 11           |

<sup>a</sup> Responses in Other include: "Parent-child relationship", "Eating disorder", "ADHD" (n=2), "Anger management" and "Medical issues, eating fears and Trauma". In secondary post-hoc analyses, we examined the influence of the clinician-reported initial treatment focus on the primary clinical outcome and found no significant influence on the trajectory of change of the parent-rated BPM ( $p=0.220$ , for interactions of treatment\*time\*initial focus – entered as anxiety, depression or conduct only due to the low numbers of trauma participants). In other words, MATCH was comparatively no more or less effective than Usual Care across the primary focus of treatment groups.
