# Supplementary material for: Effect of Clinician Training in the Modular Approach to Therapy for Children vs Usual Care on Clinical Outcomes and Use of Empirically Supported Treatments: A Randomized Clinical Trial
Source: PubMed Central journal article supplement (PMC7431993; doi:10.1001/jamanetworkopen.2020.11799), 2020-08-17
Supplement: jamanetwopen-3-e2011799-s003.pdf [file jamanetwopen-3-e2011799-s003.pdf]

## Data Sharing Statement

Merry. Effect of Clinician Training in the Modular Approach to Therapy for Children vs Usual Care on Clinical Outcomes and Use of Empirically Supported Treatments. *JAMA Netw Open*. Published August 17, 2020. 10.1001/jamanetworkopen.2020.11799

### Data

**Data available:** No

### Additional Information

**Explanation for why data not available:** We did not organise to do this when we set up the trial.
